# Supplementary material for: Risk Factors for Pressure Injuries in Adult Patients: A Narrative Synthesis
Source: MDPI journal article supplement (doi:10.3390/ijerph19020761), 2022-01-11
Supplement: s1 [file s1]

## Supplementary Material S5: risk factor domain “susceptibility and tolerance of the individual”

**Table S3:** Summary of evidence for risk factor domains and subdomains: “susceptibility and tolerance of the individual”

| Variables                                                | Studies with <u>significant</u> variables in multivariate model<br>Overall RoB, Study author, variable name                                                                      |                                                                                                                                   | Studies with <u>non-significant</u> variables in multivariate model<br>Overall RoB, Study author, variable name                                        |                                                                                                                                                       |
|----------------------------------------------------------|----------------------------------------------------------------------------------------------------------------------------------------------------------------------------------|-----------------------------------------------------------------------------------------------------------------------------------|--------------------------------------------------------------------------------------------------------------------------------------------------------|-------------------------------------------------------------------------------------------------------------------------------------------------------|
| Domain 2: susceptibility and tolerance of the individual | Stage ≥ 1 PI                                                                                                                                                                     | Stage ≥ 2 PI                                                                                                                      | Stage ≥ 1 PI                                                                                                                                           | Stage ≥ 2 PI                                                                                                                                          |
| Age                                                      | <u>Low RoB</u>                                                                                                                                                                   | <u>Low RoB</u>                                                                                                                    | <u>Low RoB</u>                                                                                                                                         | <u>Low RoB</u>                                                                                                                                        |
| 41 Studies                                               | Bergstrom (1996)<br>Cox (2011)<br>Cox (2020)<br>Han (2018)<br>Kim (2019)<br>Latimer (2019)<br>Perneger (2002)<br>Rondinelli (2018)<br>Strazzieri-Pulido (2018)<br>Schultz (1999) | Manzano (2013)<br>Nixon (2006)<br>O'Brien et al. (2014)<br>Ooi (1999)                                                             | Artico (2020)<br>Defloor and Grypdonck (2005)                                                                                                          | Cox (2011)<br>Defloor and Grypdonck (2005)                                                                                                            |
| 25/42 Variables (60%)                                    | <u>Moderate RoB</u><br>Aloweni (2019)<br>Halfens (2000)<br>Osis and Diccini (2020)<br>Shaw (2014)<br>Tsaras (2016)                                                               | <u>Moderate RoB</u><br>Bergstrom and Braden (1992)<br>Vanderwee (2009)                                                            | <u>Moderate RoB</u><br>Chan (2005)<br>González-Méndez (2018)<br>Miller (2020)<br>Tourtual (1997)                                                       | <u>Moderate RoB</u><br>Allman (1995)<br>Baumgarten (2004) - ≥ 85y<br>Bergquist and Frantz (1999)<br>Compton (2008)<br>De Laat (2007)<br>Yatabe (2013) |
|                                                          | <u>High RoB</u><br>Chen (2018)<br>Lannering (2016)<br>Serpa (2020)<br>Zarei (2019)                                                                                               | <u>High RoB</u>                                                                                                                   | <u>High RoB</u><br>Dukes (2018)<br>Goodridge (1998)<br>Magny (2017)<br>Popow (2019)                                                                    | <u>High RoB</u>                                                                                                                                       |
| Sex                                                      | <u>Low RoB</u>                                                                                                                                                                   | <u>Low RoB</u>                                                                                                                    | <u>Low RoB</u>                                                                                                                                         | <u>Low RoB</u>                                                                                                                                        |
| 25 Studies                                               | Cox (2020) – male<br>Han (2018) – female<br>Kim (2019) – male<br>Rondinelli (2018) – male                                                                                        | Brandeis (1994) – males in low incidence homes                                                                                    | Artico (2020) – male<br>Bergstrom (1996) – female                                                                                                      |                                                                                                                                                       |
| 11/25 Variables (44%)                                    | <u>Moderate RoB</u><br>Aloweni (2019) – female<br>Forni (2018) – male                                                                                                            | <u>Moderate RoB</u><br>Bergquist and Frantz (1999) – male<br>Compton (2008) – male<br>Okuwa (2006) – male<br>Yatabe (2013) – male | <u>Moderate RoB</u><br>Chan (2005)<br>González-Méndez (2018) – male<br>Miller (2020) – male<br>Shaw (2014) – male                                      | <u>Moderate RoB</u><br>Baumgarten (2004) – male<br>Manzano (2014)                                                                                     |
|                                                          | <u>High RoB</u>                                                                                                                                                                  | <u>High RoB</u>                                                                                                                   | <u>High RoB</u><br>Chen (2018) - female<br>Dukes (2018) – male<br>Goodridge (1998)<br>Lannering (2016) – gender<br>Magny (2017)<br>Serpa (2020) – male | <u>High RoB</u>                                                                                                                                       |
| Ethnic group                                             | <u>Low RoB</u>                                                                                                                                                                   | <u>Low RoB</u>                                                                                                                    | <u>Low RoB</u>                                                                                                                                         | <u>Low RoB</u>                                                                                                                                        |
|                                                          | Bergstrom (1996) – white                                                                                                                                                         |                                                                                                                                   |                                                                                                                                                        | Brandeis (1994) – white                                                                                                                               |

|                       |                                                                                                                                                                                                                                                                                                                                                  |                                                                                                                     |                                                                                                                                                                                                                                                                 |                                                                                                                                                                                                                                                                                    |
|-----------------------|--------------------------------------------------------------------------------------------------------------------------------------------------------------------------------------------------------------------------------------------------------------------------------------------------------------------------------------------------|---------------------------------------------------------------------------------------------------------------------|-----------------------------------------------------------------------------------------------------------------------------------------------------------------------------------------------------------------------------------------------------------------|------------------------------------------------------------------------------------------------------------------------------------------------------------------------------------------------------------------------------------------------------------------------------------|
| 6 Studies             | <u>Moderate RoB</u>                                                                                                                                                                                                                                                                                                                              | <u>Moderate RoB</u><br>Baumgarten (2004) – black                                                                    | <u>Moderate RoB</u><br>Aloweni (2019) – Chinese<br>Chan (2005)<br>Miller (2020) – white                                                                                                                                                                         | <u>Moderate RoB</u>                                                                                                                                                                                                                                                                |
| 2/6 Variables (33%)   | <u>High RoB</u>                                                                                                                                                                                                                                                                                                                                  | <u>High RoB</u>                                                                                                     | <u>High RoB</u>                                                                                                                                                                                                                                                 | <u>High RoB</u>                                                                                                                                                                                                                                                                    |
| Laboratory values     | <u>Low RoB</u><br>Galivanche (2020) – high preoperative platelet count (>417)<br>Rondinelli (2018) – LAPS 2 score                                                                                                                                                                                                                                | <u>Low RoB</u><br>Reed (2003) – low albumin level (<3 g/dl)                                                         | <u>Low RoB</u>                                                                                                                                                                                                                                                  | <u>Low RoB</u><br>Nixon (2006) – hemoglobin on admission or preoperatively (g/l)                                                                                                                                                                                                   |
| 21 Studies            |                                                                                                                                                                                                                                                                                                                                                  |                                                                                                                     |                                                                                                                                                                                                                                                                 |                                                                                                                                                                                                                                                                                    |
| 17/36 Variables (47%) | <u>Moderate RoB</u><br>Aloweni (2019) – anemia<br>Miller (2020) – Hba1c (>7%), mean hemoglobin<br>Tsaras (2016) – hematocrit                                                                                                                                                                                                                     | <u>Moderate RoB</u><br>Allman (1995) – lymphopenia<br>Bergquist and Frantz (1999) – anemia                          | <u>Moderate RoB</u><br>Bergstrom and Braden (1992) – albumin<br>Gao (2018) – preoperative hemoglobin<br>Miller (2020) – mean albumin                                                                                                                            | <u>Moderate RoB</u><br>Bergstrom and Braden (1992) – albumin<br>Compton (2008) – max. creatinine, max. blood glucose, max. c-reactive protein, min. thromboplastin time, max. serum bilirubin<br>Manzano (2014) – albumin, anemia<br>Okuwa (2006) – sodium level, hemoglobin level |
|                       | <u>High RoB</u><br>Bourdel<br>Marchasson (2000) – 1 g/L albumin decrease<br>Ek (1991) – Albumin<br>Magny (2017) – 1 g/L albumin decrease<br>Popow (2019) – low protein concentration<br>Salzberg (1999) – serum creatinine<br>Sternal (2016) – lowest recorded sodium concentration, haemoglobin at admission, lowest recorded haemoglobin level | <u>High RoB</u>                                                                                                     | <u>High RoB</u><br>Chen (2018) – hyperlipidemia<br>Magny (2017) – creatinine, hemoglobin<br>Popow (2019) – high hemoglobin concentration<br>Salzberg (1999) – Albumin                                                                                           | <u>High RoB</u>                                                                                                                                                                                                                                                                    |
| Nutrition             | <u>Low RoB</u><br>Cox (2020) – moderate to severe malnutrition (ICD 9 code)                                                                                                                                                                                                                                                                      | <u>Low RoB</u><br>Brandeis (1994) – difficulty feeding itself in high incidence homes<br>Reed (2003) – malnourished | <u>Low RoB</u><br>Artico (2020) – ESASr score lack of appetite, artificial nutritio<br>Cox (2011) – Braden nutrition<br>Defloor and Grypdonck (2005) – Braden nutrition, extra nutrients (protein supplements), fluid intake<br>Nixon (2006) – Braden nutrition | <u>Low RoB</u><br>Cox (2011) – Braden nutrition<br>Defloor and Grypdonck (2005) – Braden nutrition, extra nutrients (protein supplements), fluid intake                                                                                                                            |
| 24 Studies            |                                                                                                                                                                                                                                                                                                                                                  |                                                                                                                     |                                                                                                                                                                                                                                                                 |                                                                                                                                                                                                                                                                                    |
| 15/37 Variables (41%) |                                                                                                                                                                                                                                                                                                                                                  |                                                                                                                     |                                                                                                                                                                                                                                                                 |                                                                                                                                                                                                                                                                                    |

|                       |                                                                                                                                                                                                                                                                                                                                           |                                                                                                                                              |                                                                                                                                                                                                                                                                                                                                                                                     |                                                                                                                                                                                                                                                                                                       |                                                           |
|-----------------------|-------------------------------------------------------------------------------------------------------------------------------------------------------------------------------------------------------------------------------------------------------------------------------------------------------------------------------------------|----------------------------------------------------------------------------------------------------------------------------------------------|-------------------------------------------------------------------------------------------------------------------------------------------------------------------------------------------------------------------------------------------------------------------------------------------------------------------------------------------------------------------------------------|-------------------------------------------------------------------------------------------------------------------------------------------------------------------------------------------------------------------------------------------------------------------------------------------------------|-----------------------------------------------------------|
|                       |                                                                                                                                                                                                                                                                                                                                           |                                                                                                                                              |                                                                                                                                                                                                                                                                                                                                                                                     | Perneger (2002) –<br>Braden dietary<br>intake                                                                                                                                                                                                                                                         |                                                           |
|                       | <u>Moderate RoB</u><br>Bergstrom and<br>Braden (1992) –<br>protein (%RDA),<br>iron (%RDA)<br>Miller (2020) –<br>Minimum Braden<br>nutrition<br>Tsaousi (2015) –<br>MUST score,<br>artificial diet                                                                                                                                         | <u>Moderate RoB</u><br>Yatabe (2013) –<br>MNA scale                                                                                          | <u>Moderate RoB</u><br>Miller (2020) – mean<br>Braden nutrition,<br>nothing by mouth,<br>malnutrition status                                                                                                                                                                                                                                                                        | <u>Moderate RoB</u><br>Anrys (2018) –<br>Braden nutrition<br>Bergquist and<br>Frantz (1999) –<br>ADL dependent<br>feed<br>Compton (2008) –<br>parenteral nutrition<br>De Laat (2007) –<br>inadequate food<br>intake<br>Schoonhoven<br>(2002) - malnutrition<br>Vanderwee (2009)<br>– Braden nutrition |                                                           |
|                       | <u>High RoB</u><br>Bourdel<br>Marchasson<br>(2000) – control<br>vs. nutritional<br>intervention<br>Ek (1991) –<br>Norton food intake<br>Park and Park<br>(2017) – nutrition<br>consultation,<br>gastrointestinal<br>tube<br>Serpa (2020) –<br>moderate/high vs.<br>without risk NRS<br>2002, severe<br>malnutrition vs.<br>low risk SGANS | <u>High RoB</u>                                                                                                                              | <u>High RoB</u><br>Lannering (2016) –<br>MNA-SF reduced<br>food intake<br>Park and Park<br>(2017) – nothing by<br>mouth, malnutrition<br>Serpa (2020) – low<br>vs. without risk NRS<br>2002, moderate<br>malnutrition vs. low<br>risk SGANS,<br>adequate/probably<br>inadequate/<br>completely<br>inadequate vs.<br>excellent Braden<br>nutrition<br>Zarei (2019) –<br>malnutrition | <u>High RoB</u><br>Compton (2008) –<br>parenteral nutrition<br>De Laat (2007) –<br>inadequate food<br>intake<br>Schoonhoven<br>(2002) - malnutrition<br>Vanderwee (2009)<br>– Braden nutrition                                                                                                        |                                                           |
| Body temperature      | <u>Low RoB</u>                                                                                                                                                                                                                                                                                                                            | <u>Low RoB</u>                                                                                                                               | <u>Low RoB</u>                                                                                                                                                                                                                                                                                                                                                                      | <u>Low RoB</u>                                                                                                                                                                                                                                                                                        |                                                           |
| 7 Studies             | <u>Moderate RoB</u><br>Bergstrom and<br>Braden (1992) –<br>°F<br>Suriadi (2008) –<br>S.S. scale body<br>temperature (≥<br>37.4°C)                                                                                                                                                                                                         | <u>Moderate RoB</u>                                                                                                                          | <u>Moderate RoB</u>                                                                                                                                                                                                                                                                                                                                                                 | <u>Moderate RoB</u>                                                                                                                                                                                                                                                                                   | <u>Moderate RoB</u><br>Compton (2008)<br>Vanderwee (2009) |
| 3/7 Variables (43%)   | <u>High RoB</u><br>Sternal (2016) –<br>mean evening<br>body temperature<br>during<br>hospitalization                                                                                                                                                                                                                                      | <u>High RoB</u>                                                                                                                              | <u>High RoB</u><br>Ek (1987) – Norton<br>body temperature<br>Popow (2019) –<br>higher temperature                                                                                                                                                                                                                                                                                   | <u>High RoB</u>                                                                                                                                                                                                                                                                                       |                                                           |
| Health status         | <u>Low RoB</u><br>Artico (2020) –<br>ESASr score pain<br>Kim (2019) –<br>previous falls<br>Latimer (2019) –<br>no. of<br>comorbidities<br>Strazzieri-Pulido<br>(2018) – in<br>palliative care<br>Rondinelli (2018)<br>– COPS 2 score                                                                                                      | <u>Low RoB</u><br>Nixon (2006) –<br>baseline wound<br>O'Brien et al.<br>(2014) – ASA<br>class 4/5<br>Rademakers<br>(2007) – ASA<br>class 3/4 | <u>Low RoB</u><br>Artico (2020) – KPS<br>status >30 vs <30,<br>ESASr score<br>nausea/feeling<br>sad/feeling<br>nervous/lack of<br>energy/overall<br>wellbeing<br>Cox (2011) –<br>APACHE<br>Defloor and<br>Grypdonck (2005) –<br>pain<br>Galivanche (2020) –<br>preoperative SIRS/<br>bleeding disorder                                                                              | <u>Low RoB</u><br>Cox (2011) –<br>APACHE<br>Defloor and<br>Grypdonck (2005) –<br>pain<br>Manzano (2013) –<br>APACHE, SOFA<br>score<br>Nixon (2006) –<br>vascular patients vs<br>acute care patients                                                                                                   |                                                           |
| 29 Studies            |                                                                                                                                                                                                                                                                                                                                           |                                                                                                                                              |                                                                                                                                                                                                                                                                                                                                                                                     |                                                                                                                                                                                                                                                                                                       |                                                           |
| 15/52 Variables (29%) |                                                                                                                                                                                                                                                                                                                                           |                                                                                                                                              |                                                                                                                                                                                                                                                                                                                                                                                     |                                                                                                                                                                                                                                                                                                       |                                                           |

|                                 |                                                                                                                                                                                                |                                                                                   |                                                                                                                                                                                                                                                                            |                                                                                                                                                                                        |  |
|---------------------------------|------------------------------------------------------------------------------------------------------------------------------------------------------------------------------------------------|-----------------------------------------------------------------------------------|----------------------------------------------------------------------------------------------------------------------------------------------------------------------------------------------------------------------------------------------------------------------------|----------------------------------------------------------------------------------------------------------------------------------------------------------------------------------------|--|
|                                 |                                                                                                                                                                                                |                                                                                   |                                                                                                                                                                                                                                                                            | Han (2018) – pain<br>Strazzieri-Pulido (2018) – exit condition death                                                                                                                   |  |
|                                 | <u>Moderate RoB</u><br>Aloweni (2019) – ASA grade ≥ 3<br>González-Méndez (2018) – Complications during stay, SAPS 3 severity<br>Miličević (2012) – FIM score<br>Miller (2020) – Charlson score | <u>Moderate RoB</u><br>Anrys (2018) – pressure area related pain                  | <u>Moderate RoB</u><br>Chan (2005) – secondary diagnosis, comorbidities<br>Gao (2018) – intraoperative blood loss<br>Miličević (2012) – ASIA scale completeness of lesion/level of injury, mode of trauma                                                                  | <u>Moderate RoB</u><br>Bergquist and Frantz (1999) – unable to cough, abnormal breath sounds<br>Compton (2008) – ICU mortality<br>Manzano (2013) – diarrhea<br>Manzano (2014) – APACHE |  |
|                                 | <u>High RoB</u><br>Park and Park (2017) – diarrhea                                                                                                                                             | <u>High RoB</u>                                                                   | <u>High RoB</u><br>Dukes (2018) – injury type, injury cause<br>Lannering (2016) – no. of diagnoses<br>Magny (2017) – Charlson score, CIRS score<br>Park and Park (2017) – pain, hygiene management, weakness                                                               | <u>High RoB</u>                                                                                                                                                                        |  |
| Diagnosis                       | <u>Low RoB</u><br>Artico (2020) – cancer diagnosis vs other disease<br>Cox (2020) – influenza<br>Galivanche (2020) – urinary tract infection                                                   | <u>Low RoB</u><br>O'Brien et al. (2014) – history of renal failure                | <u>Low RoB</u><br>Cox (2011) – infection<br>Galivanche (2020) – renal failure, ascites, cachexia (>10% weight loss in 6 mo. before surgery), preoperative wound infection, postoperative superficial infection, postoperative deep infection<br>Rondinelli (2018) – stroke | <u>Low RoB</u><br>Cox (2011) – infection<br>O'Brien et al. (2014) – history of liver disease                                                                                           |  |
| 13 Studies                      |                                                                                                                                                                                                |                                                                                   |                                                                                                                                                                                                                                                                            |                                                                                                                                                                                        |  |
| 8/24 Variables (33%)            |                                                                                                                                                                                                |                                                                                   |                                                                                                                                                                                                                                                                            |                                                                                                                                                                                        |  |
|                                 | <u>Moderate RoB</u><br>Osis and Diccini (2020) – moderate/severe TBI (GCS score)                                                                                                               | <u>Moderate RoB</u>                                                               | <u>Moderate RoB</u><br>Aloweni (2019) – renal disease                                                                                                                                                                                                                      | <u>Moderate RoB</u>                                                                                                                                                                    |  |
|                                 | <u>High RoB</u><br>Chen (2018) – SCI, ALS, Stroke<br>Park and Park (2017) – renal failure                                                                                                      | <u>High RoB</u>                                                                   | <u>High RoB</u><br>Magny (2017) – cancer, stroke<br>Park and Park (2017) – cancer<br>Popow (2019) – oncological diagnosis<br>Zarei (2019) – kidney failure                                                                                                                 | <u>High RoB</u>                                                                                                                                                                        |  |
| <u>Subdomain Skin/PI status</u> |                                                                                                                                                                                                |                                                                                   |                                                                                                                                                                                                                                                                            |                                                                                                                                                                                        |  |
| PI stage 1                      | <u>Low RoB</u>                                                                                                                                                                                 | <u>Low RoB</u><br>Nixon (2006) – baseline PI grade 1b<br>Reed (2003) – PI stage 1 | <u>Low RoB</u>                                                                                                                                                                                                                                                             | <u>Low RoB</u>                                                                                                                                                                         |  |
| 4 Studies                       |                                                                                                                                                                                                |                                                                                   |                                                                                                                                                                                                                                                                            |                                                                                                                                                                                        |  |
| 4/4 Variables (100%)            | <u>Moderate RoB</u>                                                                                                                                                                            | <u>Moderate RoB</u>                                                               | <u>Moderate RoB</u>                                                                                                                                                                                                                                                        | <u>Moderate RoB</u>                                                                                                                                                                    |  |

|                       |                                                                                                                                                                       |                                                                                                                                                                           |                                                                                                                                                           |                                                                                                                                                                                                                  |                                              |  |
|-----------------------|-----------------------------------------------------------------------------------------------------------------------------------------------------------------------|---------------------------------------------------------------------------------------------------------------------------------------------------------------------------|-----------------------------------------------------------------------------------------------------------------------------------------------------------|------------------------------------------------------------------------------------------------------------------------------------------------------------------------------------------------------------------|----------------------------------------------|--|
|                       |                                                                                                                                                                       |                                                                                                                                                                           | Allman (1995) – non-blanchable erythema of intact sacral skin<br>Anrys (2018) – non-blanchable erythema at baseline                                       |                                                                                                                                                                                                                  |                                              |  |
|                       |                                                                                                                                                                       | <u>High RoB</u>                                                                                                                                                           | <u>High RoB</u>                                                                                                                                           | <u>High RoB</u>                                                                                                                                                                                                  | <u>High RoB</u>                              |  |
| Existing/previous PI  | <u>Low RoB</u><br>Defloor and Grypdonck (2005) – existing PI<br>Galivanche (2020) – preoperative PI                                                                   | <u>Low RoB</u><br>Defloor and Grypdonck (2005) – existing PI                                                                                                              | <u>Low RoB</u><br>Defloor and Grypdonck (2005) – existing PI                                                                                              | <u>Low RoB</u>                                                                                                                                                                                                   | <u>Low RoB</u><br>Nixon (2006) – existing PI |  |
| 8 Studies             |                                                                                                                                                                       |                                                                                                                                                                           |                                                                                                                                                           |                                                                                                                                                                                                                  |                                              |  |
| 5/9 Variables (56%)   |                                                                                                                                                                       |                                                                                                                                                                           |                                                                                                                                                           |                                                                                                                                                                                                                  |                                              |  |
|                       | <u>Moderate RoB</u><br>Milićević (2012) – existing PI                                                                                                                 | <u>Moderate RoB</u><br>Baumgarten (2004) – PI on admission                                                                                                                | <u>Moderate RoB</u><br>Tourtual (1997) – admitted with PI                                                                                                 | <u>Moderate RoB</u><br>Allman (1995) – previous PI<br>Anrys (2018) – previous PI                                                                                                                                 |                                              |  |
|                       | <u>High RoB</u>                                                                                                                                                       | <u>High RoB</u>                                                                                                                                                           | <u>High RoB</u>                                                                                                                                           | <u>High RoB</u>                                                                                                                                                                                                  |                                              |  |
| General skin status   | <u>Low RoB</u><br>Defloor and Grypdonck (2005) – skin condition (dry, macerated)                                                                                      | <u>Low RoB</u><br>Defloor and Grypdonck (2005) – skin condition (dry, macerated)<br>Nixon (2006) – baseline skin trauma                                                   | <u>Low RoB</u>                                                                                                                                            | <u>Low RoB</u>                                                                                                                                                                                                   |                                              |  |
| 7 Studies             |                                                                                                                                                                       |                                                                                                                                                                           |                                                                                                                                                           |                                                                                                                                                                                                                  |                                              |  |
| 11/17 Variables (68%) |                                                                                                                                                                       |                                                                                                                                                                           |                                                                                                                                                           |                                                                                                                                                                                                                  |                                              |  |
|                       | <u>Moderate RoB</u>                                                                                                                                                   | <u>Moderate RoB</u><br>Allman (1995) – dry sacral skin<br>Compton (2008) – edematous, mottled, reddened skin, centralized circulation                                     | <u>Moderate RoB</u>                                                                                                                                       | <u>Moderate RoB</u><br>Anrys (2018) – Dryness<br>Bergquist and Frantz (1999) – Edema<br>Compton (2008) – livid, hyperemic skin, cyanosis                                                                         |                                              |  |
|                       | <u>High RoB</u><br>Popow (2019) - Edema                                                                                                                               | <u>High RoB</u>                                                                                                                                                           | <u>High RoB</u><br>Park and Park (2017) – Edema                                                                                                           | <u>High RoB</u>                                                                                                                                                                                                  |                                              |  |
| Moisture              | <u>Low RoB</u>                                                                                                                                                        | <u>Low RoB</u>                                                                                                                                                            | <u>Low RoB</u><br>Defloor and Grypdonck (2005) – Braden moisture scale<br>Perneger (2002) – Braden moisture scale<br>Sardo (2018) – Braden moisture scale | <u>Low RoB</u><br>Defloor and Grypdonck (2005) – Braden moisture scale                                                                                                                                           |                                              |  |
| 14 Studies            |                                                                                                                                                                       |                                                                                                                                                                           |                                                                                                                                                           |                                                                                                                                                                                                                  |                                              |  |
| 8/20 Variables (40%)  |                                                                                                                                                                       |                                                                                                                                                                           |                                                                                                                                                           |                                                                                                                                                                                                                  |                                              |  |
|                       | <u>Moderate RoB</u><br>Halfens (2000) – moisture (urinary/fecal incontinence and sweat)<br>Tourtual (1997) – Braden moisture scale<br>Yoshimura (2016) – perspiration | <u>Moderate RoB</u><br>Bergquist and Frantz (1999) – Skin drainage<br>Compton (2008) – moist skin<br>Teschler (2012) – Braden moisture scale score 2 vs. 4, score 3 vs. 4 | <u>Moderate RoB</u><br>Halfens (2000) – Braden moisture scale<br>Miller (2020) – mean, minimum Braden moisture scale                                      | <u>Moderate RoB</u><br>Anrys (2018) – Braden moisture scale<br>Bergquist and Frantz (1999) – Braden moisture scale<br>De Laat (2007) – constantly moist<br>Teschler (2012) – Braden moisture scale score 1 vs. 4 |                                              |  |

|                                                                                    |                                                                                                                                                                                                                                                                                                                                                                                                        |                                                                                                                                                                                                                                                                                             |                                                                                                                                                                                                                                                                                                |                                                                                                                                                                                                                                                                                              |
|------------------------------------------------------------------------------------|--------------------------------------------------------------------------------------------------------------------------------------------------------------------------------------------------------------------------------------------------------------------------------------------------------------------------------------------------------------------------------------------------------|---------------------------------------------------------------------------------------------------------------------------------------------------------------------------------------------------------------------------------------------------------------------------------------------|------------------------------------------------------------------------------------------------------------------------------------------------------------------------------------------------------------------------------------------------------------------------------------------------|----------------------------------------------------------------------------------------------------------------------------------------------------------------------------------------------------------------------------------------------------------------------------------------------|
|                                                                                    |                                                                                                                                                                                                                                                                                                                                                                                                        |                                                                                                                                                                                                                                                                                             |                                                                                                                                                                                                                                                                                                | Vanderwee (2009)<br>– Braden moisture<br>scale<br><u>High RoB</u>                                                                                                                                                                                                                            |
|                                                                                    | <u>High RoB</u><br>Salzberg (1999) –<br>moisture                                                                                                                                                                                                                                                                                                                                                       | <u>High RoB</u>                                                                                                                                                                                                                                                                             | <u>High RoB</u>                                                                                                                                                                                                                                                                                |                                                                                                                                                                                                                                                                                              |
| Incontinence                                                                       | <u>Low RoB</u>                                                                                                                                                                                                                                                                                                                                                                                         | <u>Low RoB</u><br>Brandeis (1994) –<br>fecal incontinence<br>in high incidence<br>homes<br>Ooi (1999) – dual<br>incontinence                                                                                                                                                                | <u>Low RoB</u><br>Perneger (2002) –<br>Norton incontinence                                                                                                                                                                                                                                     | <u>Low RoB</u><br>Brandeis (1994) –<br>urinary incontinence<br>Reed (2003) – fecal<br>incontinence                                                                                                                                                                                           |
| 12 Studies                                                                         |                                                                                                                                                                                                                                                                                                                                                                                                        |                                                                                                                                                                                                                                                                                             |                                                                                                                                                                                                                                                                                                |                                                                                                                                                                                                                                                                                              |
| 4/12 Variables (33%)                                                               | <u>Moderate RoB</u>                                                                                                                                                                                                                                                                                                                                                                                    | <u>Moderate RoB</u><br>Bergquist and<br>Frantz (1999) –<br>bowel/bladder<br>incontinence<br>Vanderwee (2009)<br>– urinary<br>incontinence<br>(decreases risk)                                                                                                                               | <u>Moderate RoB</u><br>Tourtual (1997) –<br>any incontinence                                                                                                                                                                                                                                   | <u>Moderate RoB</u><br>Allman (1995) –<br>fecal incontinence<br>Baumgarten (2004)<br>– urinary<br>incontinence, fecal<br>incontinence, dual<br>incontinence<br>Bergquist and<br>Frantz (1999) –<br>urinary incontinence<br>Vanderwee (2009)<br>– fecal<br>incontinence, dual<br>incontinence |
|                                                                                    | <u>High RoB</u>                                                                                                                                                                                                                                                                                                                                                                                        | <u>High RoB</u>                                                                                                                                                                                                                                                                             | <u>High RoB</u><br>Park and Park<br>(2017) –<br>incontinence<br>Popow (2019) –<br>Norton incontinence<br>Salzberg (1999) –<br>urinary incontinence                                                                                                                                             | <u>High RoB</u>                                                                                                                                                                                                                                                                              |
| <u>Subdomain poor perfusion</u><br>Diagnosis related to<br>oxygenation/circulation | <u>Low RoB</u><br>Artico (2020) –<br>ESASr score<br>shortness of<br>breath<br>Cox (2011) –<br>cardiovascular<br>disease<br>Cox (2020) –<br>cardiovascular<br>disease,<br>peripheral<br>vascular disease,<br>septic shock,<br>pneumonia<br>Galivanche (2020)<br>– insulin-<br>dependent<br>diabetes, pre- and<br>postoperative<br>sepsis,<br>postoperative<br>pneumonia<br>Schultz (1999) –<br>Diabetes | <u>Low RoB</u><br>Brandeis (1994) –<br>diabetes in high<br>incidence home<br>Cox (2011) –<br>cardiovascular<br>disease<br>Nixon (2006) –<br>Diabetes<br>O'Brien et al.<br>(2014) – history of<br>congestive heart<br>failure<br>Ooi (1999) –<br>Diabetes<br>Rademakers<br>(2007) – Diabetes | <u>Low RoB</u><br>Defloor and<br>Grypdonck (2005) –<br>skin circulation<br>Galivanche (2020) –<br>non-insulin<br>dependent diabetes,<br>congestive heart<br>failure, low<br>preoperative platelet<br>count, myocardial<br>infarction, pulmonary<br>embolism<br>Rondinelli (2018) –<br>Diabetes | <u>Low RoB</u><br>Defloor and<br>Grypdonck (2005) –<br>skin circulation<br>O'Brien et al. (2014)<br>– history of diabetes                                                                                                                                                                    |
| 28 Studies                                                                         |                                                                                                                                                                                                                                                                                                                                                                                                        |                                                                                                                                                                                                                                                                                             |                                                                                                                                                                                                                                                                                                |                                                                                                                                                                                                                                                                                              |
| 27/59 Variables (46%)                                                              | <u>Moderate RoB</u><br>Aloweni (2019) –<br>respiratory<br>disease<br>Boyle and Green<br>(2001) –<br>cardiovascular<br>instability                                                                                                                                                                                                                                                                      | <u>Moderate RoB</u><br>Okuwa (2006) –<br>ABI<br>Tescher (2012) –<br>acute respiratory<br>failure<br>Vanderwee (2009)<br>– cerebral<br>vascular accident                                                                                                                                     | <u>Moderate RoB</u><br>Aloweni (2019) –<br>Diabetes, heart<br>disease<br>González-Méndez<br>(2018) – Diabetes<br>Miller (2020) –<br>smoking history                                                                                                                                            | <u>Moderate RoB</u><br>Compton (2008) –<br>sepsis<br>Vanderwee (2009)<br>– Diabetes                                                                                                                                                                                                          |

|                         |                                                                                                                             |                                                                       |                                                                                                                                                                                                                                                                                                                                         |                                                                                                                                                                    |
|-------------------------|-----------------------------------------------------------------------------------------------------------------------------|-----------------------------------------------------------------------|-----------------------------------------------------------------------------------------------------------------------------------------------------------------------------------------------------------------------------------------------------------------------------------------------------------------------------------------|--------------------------------------------------------------------------------------------------------------------------------------------------------------------|
|                         | Suriadi (2008) –<br>S.S. scale<br>smoking                                                                                   |                                                                       | Tourtual (1997) –<br>diagnosed with CHF,<br>pulses                                                                                                                                                                                                                                                                                      |                                                                                                                                                                    |
|                         | <u>High RoB</u><br>Magny (2017) –<br>Diabetes, chronic<br>coronary heart<br>disease<br>Zarei (2019) –<br>Diabetes, smoking  | <u>High RoB</u>                                                       | <u>High RoB</u><br>Chen (2018) –<br>Diabetes, IHD,<br>Asthma, COPD<br>Magny (2017) –<br>periphal vascular<br>disease, heart valve<br>disease, cardiac<br>failure, COPD<br>Popow (2019) –<br>Diabetes,<br>arteriosclerosis,<br>vessel diagnosis,<br>COPD, Asthma<br>Salzberg (1999) –<br>pulmonary disease<br>Serpa (2020) –<br>Diabetes | <u>High RoB</u>                                                                                                                                                    |
| Oxygenation/ventilation | <u>Low RoB</u><br>Kim (2019) – SpO <sub>2</sub><br>monitoring<br>Strazzieri-Pulido<br>(2018) –<br>mechanical<br>ventilation | <u>Low RoB</u><br>O'Brien et al.<br>(2014) – existing<br>airway       | <u>Low RoB</u><br>Rondinelli (2018) –<br>full code designation<br>Sala (2020) – FiO <sub>2</sub> ><br>50%                                                                                                                                                                                                                               | <u>Low RoB</u>                                                                                                                                                     |
| 11 Studies              | <u>Moderate RoB</u><br>Gao (2018) –<br>cardiopulmonary<br>bypass (surgical)                                                 | <u>Moderate RoB</u><br>Bergquist and<br>Frantz (1999) –<br>oxygen use | <u>Moderate RoB</u><br>Shaw (2014) –<br>heart-lung machine<br>used                                                                                                                                                                                                                                                                      | <u>Moderate RoB</u><br>Compton (2008) –<br>min. PaCO <sub>2</sub> , min.<br>arterial pH,<br>mechanical<br>ventilation                                              |
| 7/17 Variables (41%)    | <u>High RoB</u><br>Park and Park<br>(2017) –<br>ventilators,<br>tracheostomy tube                                           | <u>High RoB</u>                                                       | <u>High RoB</u><br>Dukes (2018) –<br>mechanical<br>ventilation, lowest<br>SpO <sub>2</sub><br>Park and Park<br>(2017) –<br>endotracheal tube,<br>oxygen therapy                                                                                                                                                                         | <u>High RoB</u>                                                                                                                                                    |
| Vasopressor             | <u>Low RoB</u><br>Cox (2020) –<br>norepinephrine                                                                            | <u>Low RoB</u><br>Cox (2011) -<br>norepinephrine                      | <u>Low RoB</u><br>Cox (2011) –<br>norepinephrine,<br>vasopressin<br>Sala (2020) –<br>vasopressor<br>administered<br>Strazzieri-Pulido<br>(2018) – vasoactive<br>drugs                                                                                                                                                                   | <u>Low RoB</u><br>Cox (2011) –<br>vasopressin<br>O'Brien et al. (2014)<br>– use of<br>corticosteroid                                                               |
| 10 Studies              | <u>Moderate RoB</u><br>Osis and Diccini<br>(2020) –<br>noradrenaline use                                                    | <u>Moderate RoB</u>                                                   | <u>Moderate RoB</u>                                                                                                                                                                                                                                                                                                                     | <u>Moderate RoB</u><br>Compton (2008) –<br>vasopressor<br>therapy<br>Schoonhoven<br>(2002) – method of<br>anesthesia (with or<br>without vasoactive<br>medication) |
| 3/13 Variables (23%)    | <u>High RoB</u>                                                                                                             | <u>High RoB</u>                                                       | <u>High RoB</u><br>Dukes (2018) –<br>vasoactive<br>medication<br>Park and Park<br>(2017) – cardiac<br>stimulants                                                                                                                                                                                                                        | <u>High RoB</u>                                                                                                                                                    |

|                       |                                                                                                                                                                                                    |                                                                                                                |                                                                                                                                                                                                           |                                                                                                                 |
|-----------------------|----------------------------------------------------------------------------------------------------------------------------------------------------------------------------------------------------|----------------------------------------------------------------------------------------------------------------|-----------------------------------------------------------------------------------------------------------------------------------------------------------------------------------------------------------|-----------------------------------------------------------------------------------------------------------------|
| Blood pressure        | <u>Low RoB</u><br>Aloweni (2019) – Hypertension<br>Cox (2020) – Hypotension<br>Sala (2020) – mean arterial pressure < 60mmHg                                                                       | <u>Low RoB</u>                                                                                                 | <u>Low RoB</u><br>Galivanche (2020) – Hypertension<br>Sala (2020) – fluid bolus volume                                                                                                                    | <u>Low RoB</u><br>Cox (2011) – mean arterial pressure, systolic pressure, diastolic pressure                    |
| 14 Studies            | <u>Moderate RoB</u><br>Bergstrom and Braden (1992) – diastolic blood pressure                                                                                                                      | <u>Moderate RoB</u><br>Bergstrom and Braden (1992) – systolic blood pressure<br>Vanderwee (2009) - Hypotension | <u>Moderate RoB</u>                                                                                                                                                                                       | <u>Moderate RoB</u><br>Compton (2008) – max. heart rate, invasive monitoring<br>Vanderwee (2009) - Hypertension |
| 10/24 Variables (42%) | <u>High RoB</u><br>Magny (2017) – atrial fibrillation<br>Serpa (2020) – Hypertension<br>Sternal (2016) – systolic blood pressure at admission, mean systolic blood pressure during hospitalization | <u>High RoB</u>                                                                                                | <u>High RoB</u><br>Chen (2018) – Hypertension<br>Dukes (2018) – Highest systolic blood pressure, mean arterial pressure, average heart rate<br>Magny (2017) – Hypertension<br>Popow (2019) – Hypertension | <u>High RoB</u>                                                                                                 |

---

PI, pressure injury; RoB, risk of bias
