# Supplementary material for: Risk Factors for Pressure Injuries in Adult Patients: A Narrative Synthesis
Source: MDPI journal article supplement (doi:10.3390/ijerph19020761), 2022-01-11
Supplement: s1 [file s1]

## Supplementary Material S4: risk factor domain “mechanical boundary condition”

**Table S2:** Summary of evidence for risk factor domains and subdomains: “mechanical boundary condition”

| Variables                                      | Studies with <u>significant</u> variables in multivariate model<br>Overall RoB, Study author, variable name                                                        |                                                                                                                 | Studies with <u>non-significant</u> variables in multivariate model<br>Overall RoB, Study author, variable name                                                |                                                                                                                                                                                                                  |
|------------------------------------------------|--------------------------------------------------------------------------------------------------------------------------------------------------------------------|-----------------------------------------------------------------------------------------------------------------|----------------------------------------------------------------------------------------------------------------------------------------------------------------|------------------------------------------------------------------------------------------------------------------------------------------------------------------------------------------------------------------|
| <b>Domain 1: mechanical boundary condition</b> | Stage ≥ 1 PI                                                                                                                                                       | Stage ≥ 2 PI                                                                                                    | Stage ≥ 1 PI                                                                                                                                                   | Stage ≥ 2 PI                                                                                                                                                                                                     |
| Body size                                      | <u>Low RoB</u><br>Schultz (1999) – body mass                                                                                                                       | <u>Low RoB</u><br>O'Brien et al. (2014) – BMI <18.5                                                             | <u>Low RoB</u><br>Defloor and Grypdonck (2005) – body mass                                                                                                     | <u>Low RoB</u><br>Brandeis (1994) – BMI<br>Defloor and Grypdonck (2005) – body mass                                                                                                                              |
| 17 Studies                                     |                                                                                                                                                                    |                                                                                                                 |                                                                                                                                                                |                                                                                                                                                                                                                  |
| 8/23 Variables (35%)                           | <u>Moderate RoB</u><br>Aloweni (2019) – BMI < 23<br>Miller (2020) – overweight (BMI > 35)<br>Gao (2018) – BMI < 18.5                                               | <u>Moderate RoB</u><br>Allman (1995) – decreased body weight (<58kg)                                            | <u>Moderate RoB</u><br>Bergstrom and Braden (1992) – ideal body weight (%)<br>Miller (2020) - underweight                                                      | <u>Moderate RoB</u><br>Bergstrom and Braden (1992) – ideal body weight (%)<br>Compton (2008) – body weight (kg), height (cm), BMI<br>Vanderwee (2009) – underweight/overweight vs. Normal<br>Yatabe (2013) – BMI |
|                                                | <u>High RoB</u><br>Aghazadeh (2020) – weight (kg)<br>Dukes (2018) – BMI                                                                                            | <u>High RoB</u>                                                                                                 | <u>High RoB</u><br>Lannering (2016) – MNA-SF loss of weight, BMI<br>Park and Park (2017) – weight<br>Serpa (2020) – underweight/overweight/obese vs. eutrophic | <u>High RoB</u>                                                                                                                                                                                                  |
| Friction/shear                                 | <u>Low RoB</u><br>Perneger (2002) – Braden<br>friction/shear                                                                                                       | <u>Low RoB</u><br>Cox (2011) – Braden<br>friction/shear                                                         | <u>Low RoB</u><br>Cox (2011) – Braden<br>friction/shear<br>Defloor and Grypdonck (2005) – Braden friction/shear<br>Sardo (2018) – Braden friction/shear        | <u>Low RoB</u><br>Defloor and Grypdonck (2005) – Braden<br>friction/shear                                                                                                                                        |
| 11 Studies                                     |                                                                                                                                                                    |                                                                                                                 |                                                                                                                                                                |                                                                                                                                                                                                                  |
| 7/14 Variables (50%)                           | <u>Moderate RoB</u><br>Halfens (2000) – Braden<br>friction/shear<br>Miller (2020) – Minimum Braden<br>friction score<br>Tourtual (1997) – Braden<br>friction/shear | <u>Moderate RoB</u><br>De Laat (2007) – friction and shear present<br>Teschner (2012) – Braden score 1, 2 vs. 3 | <u>Moderate RoB</u><br>Miller (2020) – mean Braden friction                                                                                                    | <u>Moderate RoB</u><br>Bergquist and Frantz (1999) – Braden<br>friction/shear<br>Vanderwee (2009) – Braden<br>friction/shear                                                                                     |
|                                                | <u>High RoB</u>                                                                                                                                                    | <u>High RoB</u>                                                                                                 | <u>High RoB</u>                                                                                                                                                | <u>High RoB</u>                                                                                                                                                                                                  |
| Interface pressure                             | <u>Low RoB</u><br>Schultz (1999) – mattress overlay                                                                                                                | <u>Low RoB</u><br>Manzano (2013) - mattress                                                                     | <u>Low RoB</u><br>Defloor and Grypdonck (2005) – sitting posture<br>Kim (2019) – use of restraints                                                             | <u>Low RoB</u><br>Defloor and Grypdonck (2005) – sitting posture<br>Nixon (2006) – overlay: mattress                                                                                                             |
| 16 Studies                                     |                                                                                                                                                                    |                                                                                                                 |                                                                                                                                                                |                                                                                                                                                                                                                  |
| 10/19 Variables (53%)                          |                                                                                                                                                                    |                                                                                                                 |                                                                                                                                                                |                                                                                                                                                                                                                  |

|                             |                                                                                                                                                                                                                                                                                                                                              |                                                                                                                                                                                                                          |                                                                                                                                                                                                                                                                                                                                                                |                                                                                                                                                                                                                                                   |
|-----------------------------|----------------------------------------------------------------------------------------------------------------------------------------------------------------------------------------------------------------------------------------------------------------------------------------------------------------------------------------------|--------------------------------------------------------------------------------------------------------------------------------------------------------------------------------------------------------------------------|----------------------------------------------------------------------------------------------------------------------------------------------------------------------------------------------------------------------------------------------------------------------------------------------------------------------------------------------------------------|---------------------------------------------------------------------------------------------------------------------------------------------------------------------------------------------------------------------------------------------------|
|                             |                                                                                                                                                                                                                                                                                                                                              |                                                                                                                                                                                                                          | Strazzieri-Pulido (2018) – mattress type                                                                                                                                                                                                                                                                                                                       |                                                                                                                                                                                                                                                   |
|                             | <u>Moderate RoB</u><br>Donnelly (2011) – heel support surface<br>Forni (2018) – foam dressing<br>Gao (2018) – application of external force during operation, prone position during operation<br>Shaw (2014) – nonsupine vs. supine position<br>Suriadi (2008) – S.S. scale interface pressure ( $\geq 35$ mmHg, bony prominence, at sacrum) | <u>Moderate RoB</u><br>De Laat (2007) – preventive transfer to specific mattress vs. no transfer                                                                                                                         | <u>Moderate RoB</u>                                                                                                                                                                                                                                                                                                                                            | <u>Moderate RoB</u><br>Anrys (2018) – static air mattress vs. alternating pressure air mattress<br>Schoonhoven (2002) – mattress on OR table (air and warming mattress), posture on OR table                                                      |
|                             | <u>High RoB</u><br>Dukes (2018) – more than 2 transports                                                                                                                                                                                                                                                                                     | <u>High RoB</u>                                                                                                                                                                                                          | <u>High RoB</u><br>Dukes (2018) – vacuum spine board, en route time (h)                                                                                                                                                                                                                                                                                        | <u>High RoB</u><br>Park and Park (2017) – restraint                                                                                                                                                                                               |
| <u>Subdomain immobility</u> |                                                                                                                                                                                                                                                                                                                                              |                                                                                                                                                                                                                          |                                                                                                                                                                                                                                                                                                                                                                |                                                                                                                                                                                                                                                   |
| <u>Mobility</u>             |                                                                                                                                                                                                                                                                                                                                              |                                                                                                                                                                                                                          |                                                                                                                                                                                                                                                                                                                                                                |                                                                                                                                                                                                                                                   |
| 28 Studies                  | <u>Low RoB</u><br>Cox (2011) – Braden mobility<br>Cox (2020) – cardiovascular surgery<br>Perneger (2002) – Braden mobility<br>Sardo (2018) – Braden mobility                                                                                                                                                                                 | <u>Low RoB</u><br>Brandeis (1994) – ambulation difficulty<br>O'Brien et al. (2014) – noncardiac surgery<br>Rademakers (2007) – postoperative hip dislocation, time to surgery > 12h                                      | <u>Low RoB</u><br>Defloor and Grypdonck (2005) – spontaneous movements<br>Galivanche (2020) – pre-/postoperative use of mobility aid                                                                                                                                                                                                                           | <u>Low RoB</u><br>Cox (2011) – Braden mobility<br>Defloor and Grypdonck (2005) – spontaneous movements<br>Rademakers (2007) – delayed commencement of mobilization (> 2days)                                                                      |
| 26 /51 Variables (51%)      | <u>Moderate RoB</u><br>Boyle and Green (2001) – coma/unresponsiveness/paralyzed and sedated<br>Gao (2018) – operation time<br>Shaw (2014) – use of general anesthesia (PI directly after surgery), orthopedics surgery, cardiac surgery (PI 30 min after surgery)<br>Yoshimura (2016) – > 6hrs surgery + core temperature > 38.1°C           | <u>Moderate RoB</u><br>Bergquist and Frantz (1999) – Braden mobility, recent fracture<br>Schoonhoven (2002) – length of surgery<br>Teschler (2012) – surgery, Braden score 2 vs. 3, 4<br>Vanderwee (2009) – contractures | <u>Moderate RoB</u><br>Gao (2018) – preoperative waiting time (min)<br>Halfens (2000) – Braden mobility<br>Miller (2020) – time in OR<br>Shaw (2014) – use of general anesthesia (PI 30 min after surgery), neurosurgery, cardiac surgery<br>Tourtual (1997) – Braden mobility, limb weakness<br>Yoshimura (2016) – > 6hrs surgery + core temperature < 38.1°C | <u>Moderate RoB</u><br>Bergquist and Frantz (1999) – ADL: toilet, transfer, bath<br>De Laat (2007) – major surgery<br>Schoonhoven (2002) – posture on OR table<br>Teschler (2012) – Braden score 1 vs. 3, 4<br>Vanderwee (2009) – Braden mobility |
|                             | <u>High RoB</u><br>Bourdel Marchasson (2000) – lower limb fracture<br>Ek (1987) – Norton mobility<br>Ek (1991) – Norton mobility                                                                                                                                                                                                             | <u>High RoB</u>                                                                                                                                                                                                          | <u>High RoB</u><br>Magny (2017) – delay to surgery<br>Park and Park (2017) – surgery<br>Popow (2019) – Norton mobility<br>Salzberg (1999) – Mobility                                                                                                                                                                                                           | <u>High RoB</u>                                                                                                                                                                                                                                   |

|                       |                                                                                                                                                                                                                         |                                                                                                                                                                                                                                                                                                                                                      |                                                                                                                                                                                                                                            |                                                                                                                                                                                                                                                                                  |
|-----------------------|-------------------------------------------------------------------------------------------------------------------------------------------------------------------------------------------------------------------------|------------------------------------------------------------------------------------------------------------------------------------------------------------------------------------------------------------------------------------------------------------------------------------------------------------------------------------------------------|--------------------------------------------------------------------------------------------------------------------------------------------------------------------------------------------------------------------------------------------|----------------------------------------------------------------------------------------------------------------------------------------------------------------------------------------------------------------------------------------------------------------------------------|
|                       | Lannering (2016)<br>– MNA-SF mobility<br>Salzberg (1999) –<br>extent of paralysis<br>Zarei (2019) –<br>muscular paralysis                                                                                               |                                                                                                                                                                                                                                                                                                                                                      |                                                                                                                                                                                                                                            |                                                                                                                                                                                                                                                                                  |
| Activity              | <u>Low RoB</u><br>Han (2018) –<br>admission with<br>wheelchair<br>Kim (2019) – ADL:<br>total and partial<br>positioning,<br>partial ambulating,<br>total and partial<br>toilet use<br>Sardo (2018) –<br>Braden activity | <u>Low RoB</u><br>Defloor and<br>Grypdonck (2005)<br>– Braden activity<br>Ooi (1999) –<br>transfer                                                                                                                                                                                                                                                   | <u>Low RoB</u><br>Defloor and<br>Grypdonck (2005) –<br>Braden activity<br>Han (2018) –<br>admission with<br>stretcher car<br>Kim (2019) – ADL:<br>total ambulating,<br>partial and total<br>eating<br>Perneger (2002) –<br>Braden activity | <u>Low RoB</u><br>Brandeis (1994) –<br>ADL: bathing,<br>transfer<br>Nixon (2006) –<br>Braden activity<br>bedfast vs walks<br>frequently                                                                                                                                          |
| 29 Studies            |                                                                                                                                                                                                                         |                                                                                                                                                                                                                                                                                                                                                      |                                                                                                                                                                                                                                            |                                                                                                                                                                                                                                                                                  |
| 20/46 Variables (43%) | <u>Moderate RoB</u><br>González-Méndez<br>(2018) – days of<br>immobilisation<br>Tsaousi (2015) –<br>limited autonomy<br>in everyday<br>activities                                                                       | <u>Moderate RoB</u><br>Allman (1995) –<br>immobility<br>Baumgarten<br>(2004) – no. of<br>ADL<br>dependencies (0-<br>6)<br>Bergquist and<br>Frantz (1999) –<br>limitation in activity<br>to wheelchair, ADL<br>dress (need<br>assistance)<br>Okuwa (2006) –<br>length of bedfast<br>period<br>Tescher (2012) –<br>Braden activity<br>score 2 vs. 3, 4 | <u>Moderate RoB</u><br>Gao (2018) – score<br>daily activity ability<br>Halfens (2000) –<br>Braden activity<br>Miller (2020) –<br>mean, minimum<br>Braden activity<br>Tourtual (1997) –<br>Braden activity                                  | <u>Moderate RoB</u><br>Baumgarten (2004)<br>– bedfast<br>Bergquist and<br>Frantz (1999) –<br>Braden activity,<br>ADL dress<br>dependent<br>De Laat (2007) –<br>inactivity, immobility<br>Tescher (2012) –<br>Braden score 1 vs.<br>3, 4<br>Vanderwee (2009)<br>– Braden activity |
|                       | <u>High RoB</u><br>Bourdel<br>Marchasson<br>(2000) –<br>Kuntzmann score<br>(1 point increase)<br>Ek (1991) –<br>Norton activity<br>Popow (2019) –<br>limited condition                                                  | <u>High RoB</u>                                                                                                                                                                                                                                                                                                                                      | <u>High RoB</u><br>Dukes (2018)-<br>duration of<br>immobility (h)<br>Ek (1987) – Norton<br>activity<br>Park and Park<br>(2017) – activity<br>disorder<br>Magny (2017) –<br>ADL6, IADL4<br>Salzberg (1999) –<br>level of activity           | <u>High RoB</u>                                                                                                                                                                                                                                                                  |
| Sensory perception    | <u>Low RoB</u><br>Defloor and<br>Grypdonck (2005)<br>– Braden subscale                                                                                                                                                  | <u>Low RoB</u><br>Defloor and<br>Grypdonck (2005)<br>– Braden subscale                                                                                                                                                                                                                                                                               | <u>Low RoB</u><br>Cox (2011) – Braden<br>subscale<br>Perneger (2002) –<br>Braden subscale<br>Sardo (2018) –<br>Braden subscale                                                                                                             | <u>Low RoB</u><br>Cox (2011) –<br>Braden subscale                                                                                                                                                                                                                                |
| 9 Studies             |                                                                                                                                                                                                                         |                                                                                                                                                                                                                                                                                                                                                      |                                                                                                                                                                                                                                            |                                                                                                                                                                                                                                                                                  |
| 4/13 Variables (31%)  | <u>Moderate RoB</u><br>Halfens (2000) –<br>Braden subscale                                                                                                                                                              | <u>Moderate RoB</u><br>Tescher (2012) –<br>Braden score 2/3<br>vs. 4                                                                                                                                                                                                                                                                                 | <u>Moderate RoB</u><br>Miller (2020) –<br>mean, minimum<br>score<br>Tourtual (1997) –<br>Braden subscale                                                                                                                                   | <u>Moderate RoB</u><br>Tescher (2012) –<br>Braden score 1 vs.<br>4<br>Vanderwee (2009)<br>– Braden subscale                                                                                                                                                                      |
|                       | <u>High RoB</u>                                                                                                                                                                                                         | <u>High RoB</u>                                                                                                                                                                                                                                                                                                                                      | <u>High RoB</u>                                                                                                                                                                                                                            | <u>High RoB</u>                                                                                                                                                                                                                                                                  |
| Mental status         | <u>Low RoB</u><br>Artico (2020) –<br>ESASr score<br>sleepy                                                                                                                                                              | <u>Low RoB</u><br>Reed (2003) -<br>confused                                                                                                                                                                                                                                                                                                          | <u>Low RoB</u><br>Defloor and<br>Grypdonck (2005) –<br>Norton mental state                                                                                                                                                                 | <u>Low RoB</u><br>Brandeis (1994) -<br>disorientation<br>Defloor and<br>Grypdonck (2005) –<br>Norton mental state                                                                                                                                                                |
| 18 Studies            |                                                                                                                                                                                                                         |                                                                                                                                                                                                                                                                                                                                                      |                                                                                                                                                                                                                                            |                                                                                                                                                                                                                                                                                  |
| 9/29 Variables (31%)  |                                                                                                                                                                                                                         |                                                                                                                                                                                                                                                                                                                                                      |                                                                                                                                                                                                                                            |                                                                                                                                                                                                                                                                                  |

|                       |                                                                                                                                            |                                                                   |                                                                                                                                                                                                                                                                                                      |                                                                                                                                                                                                                        |
|-----------------------|--------------------------------------------------------------------------------------------------------------------------------------------|-------------------------------------------------------------------|------------------------------------------------------------------------------------------------------------------------------------------------------------------------------------------------------------------------------------------------------------------------------------------------------|------------------------------------------------------------------------------------------------------------------------------------------------------------------------------------------------------------------------|
|                       | Galivanche (2020)<br>– postoperative<br>delirium<br>Han (2018) –<br>drowsy, stupor,<br>semi-coma/coma<br>Schultz (1999) –<br>exhibits fear |                                                                   | Galivanche (2020) –<br>preoperative<br>delirium, dementia<br>Han (2018) –<br>confused<br>Perneger (2002) –<br>Norton mental status<br>Sala (2020) –<br>Glasgow Coma<br>Scale ≤ 8                                                                                                                     |                                                                                                                                                                                                                        |
|                       | <u>Moderate RoB</u>                                                                                                                        | <u>Moderate RoB</u>                                               | <u>Moderate RoB</u>                                                                                                                                                                                                                                                                                  | <u>Moderate RoB</u><br>Anrys (2018) –<br>neurological<br>disorders<br>Baumgarten (2004)<br>– dementia<br>Compton (2008) –<br>min./max Glasgow<br>Coma Scale<br>De Laat (2007) –<br>limited response or<br>unresponsive |
|                       | <u>High RoB</u><br>Park and Park<br>(2017) –<br>decreased<br>consciousness<br>Popow (2019) –<br>neurological<br>diagnosis                  | <u>High RoB</u>                                                   | <u>High RoB</u><br>Ek (1987) – Norton<br>mental state<br>Magny (2017) –<br>dementia,<br>hemiplegia/paraplegi<br>a<br>Lannering (2016) –<br>MNA-SF<br>psychological stress,<br>neuropsych<br>impairment<br>Park and Park<br>(2017) – cognitive<br>impairment<br>Popow (2019) –<br>Norton mental state | <u>High RoB</u>                                                                                                                                                                                                        |
| Turning/repositioning | <u>Low RoB</u>                                                                                                                             | <u>Low RoB</u>                                                    | <u>Low RoB</u>                                                                                                                                                                                                                                                                                       | <u>Low RoB</u>                                                                                                                                                                                                         |
| 1 Study               | <u>Moderate RoB</u>                                                                                                                        | <u>Moderate RoB</u>                                               | <u>Moderate RoB</u>                                                                                                                                                                                                                                                                                  | <u>Moderate RoB</u>                                                                                                                                                                                                    |
| 1/2 Variables (50%)   |                                                                                                                                            | Manzano (2014) –<br>implementation<br>rate of turning<br>schedule |                                                                                                                                                                                                                                                                                                      | Manzano (2014) –<br>2h turning                                                                                                                                                                                         |
|                       | <u>High RoB</u>                                                                                                                            | <u>High RoB</u>                                                   | <u>High RoB</u>                                                                                                                                                                                                                                                                                      | <u>High RoB</u>                                                                                                                                                                                                        |

---

PI, pressure injury; RoB, risk of bias
