# Supplementary material for: Risk Factors for Pressure Injuries in Adult Patients: A Narrative Synthesis
Source: MDPI journal article supplement (doi:10.3390/ijerph19020761), 2022-01-11
Supplement: s1 [file s1]

## Supplementary Material S6: Additional domain “Diagnosis and Treatment”

**Table S4:** Summary of evidence for risk factor domains and subdomains: “Diagnosis and Treatment”

| Variables               | Studies with <u>significant</u> variables in multivariate model<br>Overall RoB, Study author, variable name | Studies with <u>non-significant</u> variables in multivariate model<br>Overall RoB, Study author, variable name | Studies with <u>non-significant</u> variables in multivariate model<br>Overall RoB, Study author, variable name | Studies with <u>non-significant</u> variables in multivariate model<br>Overall RoB, Study author, variable name                                                                                    |
|-------------------------|-------------------------------------------------------------------------------------------------------------|-----------------------------------------------------------------------------------------------------------------|-----------------------------------------------------------------------------------------------------------------|----------------------------------------------------------------------------------------------------------------------------------------------------------------------------------------------------|
| Diagnosis and Treatment | Stage ≥ 1 PI                                                                                                | Stage ≥ 2 PI                                                                                                    | Stage ≥ 1 PI                                                                                                    | Stage ≥ 2 PI                                                                                                                                                                                       |
| Admission type          | <u>Low RoB</u><br>Rondinelli (2018) – ER admission with medical reason                                      | <u>Low RoB</u>                                                                                                  | <u>Low RoB</u><br>Rondinelli (2018) – ER admission with surgical reason/with medical reason                     | <u>Low RoB</u><br>Nixon (2006) – acute admission<br>O'Brien et al. (2014) – emergent admission                                                                                                     |
| 9 Studies               |                                                                                                             |                                                                                                                 |                                                                                                                 |                                                                                                                                                                                                    |
| 4/11 Variables (36%)    | <u>Moderate RoB</u>                                                                                         | <u>Moderate RoB</u><br>Manzano (2014) – surgical admission                                                      | <u>Moderate RoB</u><br>Miller (2020) – ICU admission                                                            | <u>Moderate RoB</u><br>Schoonhoven (2002) – reason for admittance                                                                                                                                  |
|                         | <u>High RoB</u><br>Sternal (2016) – admission from other wards<br>Zarei (2019) – Trauma hospitalization     | <u>High RoB</u>                                                                                                 | <u>High RoB</u><br>Popow (2019) – urgent admission                                                              | <u>High RoB</u>                                                                                                                                                                                    |
| Length of stay          | <u>Low RoB</u><br>Cox (2011) – ICU stay (h)<br>Strazzieri-Pulido (2018) – ICU stay                          | <u>Low RoB</u><br>Cox (2011) – ICU stay (h)                                                                     | <u>Low RoB</u><br>Cox (2020) – ICU stay (d)                                                                     | <u>Low RoB</u>                                                                                                                                                                                     |
| 14 Studies              |                                                                                                             |                                                                                                                 |                                                                                                                 |                                                                                                                                                                                                    |
| 8/15 Variables (53%)    | <u>Moderate RoB</u><br>Miller (2020) – days<br>Tsaras (2016) – ICU stay (days)                              | <u>Moderate RoB</u>                                                                                             | <u>Moderate RoB</u><br>Aloweni (2019) – ICU stay, hospitalization stay (days)<br>Tourtual (1997)                | <u>Moderate RoB</u><br>Compton (2008) – ICU stay (days)<br>De Laat (2007) – length of ICU stay<br>Schoonhoven (2002) – number of days in ICU                                                       |
|                         | <u>High RoB</u><br>Aghazadeh (2020) – days<br>Serpa (2020) – days<br>Zarei (2019) – days                    | <u>High RoB</u>                                                                                                 | <u>High RoB</u><br>Popow (2019) – long hospitalization time                                                     | <u>High RoB</u>                                                                                                                                                                                    |
| Medication              | <u>Low RoB</u>                                                                                              | <u>Low RoB</u>                                                                                                  | <u>Low RoB</u><br>Kim (2019) – IV medication                                                                    | <u>Low RoB</u><br>Brandeis (1994) – antipsychotic drug use in high incidence homes                                                                                                                 |
| 8 Studies               |                                                                                                             |                                                                                                                 |                                                                                                                 |                                                                                                                                                                                                    |
| 5/12 (42%)              | <u>Moderate RoB</u>                                                                                         | <u>Moderate RoB</u>                                                                                             | <u>Moderate RoB</u>                                                                                             | <u>Moderate RoB</u><br>Bergquist and Frantz (1999) – prescribed use of analgesics<br>Compton (2008) – insulin therapy, sedation<br>Schoonhoven (2002) – preoperative medication<br>anticoagulants, |

|                       |                                                                                                                                                                                                                                                                                                                                                                |                                                                                                                       |                                                                                                                                                                                                                                                                       |                                                                                                                                   |
|-----------------------|----------------------------------------------------------------------------------------------------------------------------------------------------------------------------------------------------------------------------------------------------------------------------------------------------------------------------------------------------------------|-----------------------------------------------------------------------------------------------------------------------|-----------------------------------------------------------------------------------------------------------------------------------------------------------------------------------------------------------------------------------------------------------------------|-----------------------------------------------------------------------------------------------------------------------------------|
|                       |                                                                                                                                                                                                                                                                                                                                                                |                                                                                                                       |                                                                                                                                                                                                                                                                       | beta-blockers,<br>analgesics<br>Vanderwee (2009)<br>– sleeping<br>medication/tranquilizers                                        |
|                       | <u>High RoB</u><br>Lannering (2016)<br>– no. of drugs<br>Park and Park<br>(2017) – sedative<br>hypnotics, anti-<br>inflammatory<br>drugs, steroids,<br>anticoagulant                                                                                                                                                                                           | <u>High RoB</u>                                                                                                       | <u>High RoB</u><br>Park and Park<br>(2017) – analgesic,<br>anxiolytics                                                                                                                                                                                                | <u>High RoB</u>                                                                                                                   |
| Risk assessment       | <u>Low RoB</u><br>Artico (2020) –<br>Braden scale at<br>risk vs not at risk<br>Bergstrom (1996)<br>– total Braden<br>score<br>Cox (2020) – total<br>Braden score<br>Han (2018) – total<br>Braden score<br>Rondinelli (2018)<br>– total Braden<br>score<br>Sala (2020) –<br>lowest total<br>Braden score<br>Schultz (1999) –<br>admission Braden<br>scale score | <u>Low RoB</u>                                                                                                        | <u>Low RoB</u><br>Cox (2011) – total<br>Braden score<br>Defloor and<br>Grypdonck (2005) –<br>Norton general<br>physical condition<br>Perneger (2002) –<br>Norton physical<br>status                                                                                   | <u>Low RoB</u><br>Cox (2011) – total<br>Braden score<br>Defloor and<br>Grypdonck (2005) –<br>Norton general<br>physical condition |
| 26 Studies            |                                                                                                                                                                                                                                                                                                                                                                |                                                                                                                       |                                                                                                                                                                                                                                                                       |                                                                                                                                   |
| 17/34 Variables (50%) |                                                                                                                                                                                                                                                                                                                                                                |                                                                                                                       |                                                                                                                                                                                                                                                                       |                                                                                                                                   |
|                       | <u>Moderate RoB</u><br>Aloweni (2019) –<br>preoperative<br>Braden score ≥ 14<br>Bergstrom and<br>Braden (1992) –<br>total Braden score<br>Chan (2005) –<br>high and moderate<br>risk vs. low risk<br>Braden scale<br>Shaw (2014) –<br>total Braden score<br>for PI directly after<br>surgery                                                                   | <u>Moderate RoB</u><br>Anrys (2018) –<br>total Braden score<br>Bergstrom and<br>Braden (1992) –<br>total Braden score | <u>Moderate RoB</u><br>Miller (2020) –<br>mean/minimum<br>Braden score<br>Shaw (2014) – total<br>Braden score for PI<br>30 min after surgery<br>Tourtual (1997) –<br>total Braden score                                                                               | <u>Moderate RoB</u><br>Bergquist and<br>Frantz (1999) –<br>total Braden score<br>Compton (2008) –<br>Waterlow score               |
|                       | <u>High RoB</u><br>Aghazadeh (2020)<br>– total Braden<br>score<br>Bourdel-<br>Marchasson<br>(2000) – Norton<br>score (5-10 vs.<br>>14)<br>Sternal (2016) –<br>Waterlow score at<br>admission, mean<br>Waterlow score<br>during<br>hospitalization                                                                                                              | <u>High RoB</u>                                                                                                       | <u>High RoB</u><br>Ek (1987) – Norton<br>scale: social activity,<br>general physical<br>condition<br>Goodridge (1998) –<br>total Braden score<br>Park and Park<br>(2017) – total<br>Braden score<br>Popow (2019) –<br>Norton physical<br>state, Norton total<br>score | <u>High RoB</u>                                                                                                                   |
| Nursing/treatment     | <u>Low RoB</u><br>Artico (2020) –<br>urinary catheter<br>Cox (2020) –<br>hemodialysis                                                                                                                                                                                                                                                                          | <u>Low RoB</u><br>Reed (2003) –<br>urinary catheter on<br>admission, DNR<br>order                                     | <u>Low RoB</u><br>Galivanche (2020) –<br>preoperative/intraop<br>erative/postoperative<br>RBC transfusion,<br>failure to wean                                                                                                                                         | <u>Low RoB</u>                                                                                                                    |
| 14 Studies            |                                                                                                                                                                                                                                                                                                                                                                |                                                                                                                       |                                                                                                                                                                                                                                                                       |                                                                                                                                   |
| 13/21 Variables (62%) |                                                                                                                                                                                                                                                                                                                                                                |                                                                                                                       |                                                                                                                                                                                                                                                                       |                                                                                                                                   |

Kim (2019) –  
registered nurse,  
nurse assistant  
Latimer (2019) –  
aged care facility  
Strazzieri-Pulido  
(2018) – NAS  
score (increased  
labour)

Moderate RoB

Shaw (2014) – no.  
of nursing  
intervention  
Tsaras (2016) -  
hemodialysis

Moderate RoB

Bergquist and  
Frantz (1999) –  
adult child as  
caregiver

Moderate RoB

Moderate RoB

Compton (2008) –  
TISS score, urinary  
catheter

High RoB

Goodridge (1998)  
– no. of prevention  
strategies used  
prior to PI  
appearance  
Serpa (2020) –  
clinical vs. surgical  
treatment

High RoB

High RoB

Park and Park  
(2017) – foley  
catheter  
Serpa (2020) –  
public vs. private  
hospital

High RoB

---

PI, pressure injury; RoB, risk of bias
