# Supplementary material for: Risk Factors for Pressure Injuries in Adult Patients: A Narrative Synthesis
Source: MDPI journal article supplement (doi:10.3390/ijerph19020761), 2022-01-11
Supplement: s1 [file s1]

## Supplementary Material S2: search strategies

| Search strategy PubMed |                             |
|------------------------|-----------------------------|
| # 1                    | "pressure ulcer*" [TIAB]    |
| # 2                    | "pressure sore*" [TIAB]     |
| # 3                    | "pressure injur*" [TIAB]    |
| # 4                    | "pressure damage*" [TIAB]   |
| # 5                    | "Pressure Ulcer" [mh]       |
| # 6                    | "deep tissue injur*" [TIAB] |
| # 7                    | "skin ulcer*" [TIAB]        |
| # 8                    | "bed sore*" [TIAB]          |
| # 9                    | "superficial ulcer*" [TIAB] |
| # 10                   | decubitus [TIAB]            |
| # 11                   | risk [TIAB]                 |
| # 12                   | „risk factors“ [mh]         |
| # 13                   | exposure [TIAB]             |
| # 14                   | cause                       |
| # 15                   | predict* [TIAB]             |
| # 16                   | prognos* [TIAB]             |
| # 17                   | epidemiology [TIAB]         |
| # 18                   | etiology [TIAB]             |
| # 19                   | aetiology [TIAB]            |
| # 20                   | extrinsic [TIAB]            |
| # 21                   | external [TIAB]             |
| # 22                   | intrinsic [TIAB]            |
| # 23                   | internal [TIAB]             |
| # 24                   | OR #1 - #10                 |
| # 25                   | OR #11 - #23                |
| # 26                   | AND #24 - #25               |

| Search strategy Embase |                            |
|------------------------|----------------------------|
| # 1                    | "pressure ulcer*":ab,ti    |
| # 2                    | "pressure sore*":ab,ti     |
| # 3                    | "pressure injur*":ab,ti    |
| # 4                    | "pressure damage*":ab,ti   |
| # 5                    | "deep tissue injur*":ab,ti |
| # 6                    | "skin ulcer*":ab,ti        |
| # 7                    | "bed sore*":ab,ti          |
| # 8                    | "superficial ulcer*":ab,ti |
| # 9                    | decubitus:ab,ti            |
| # 10                   | risk:ab,ti                 |
| # 11                   | „risk factors”:ab,ti       |
| # 12                   | exposure:ab,ti             |
| # 13                   | cause:ab,ti                |
| # 14                   | predict*:ab,ti             |
| # 15                   | prognos*:ab,ti             |
| # 16                   | epidemiology:ab,ti         |
| # 17                   | etiology:ab,ti             |
| # 18                   | aetiology:ab,ti            |
| # 19                   | extrinsic:ab,ti            |

|   |    |                 |
|---|----|-----------------|
| # | 20 | external:ab,ti  |
| # | 21 | intrinsic:ab,ti |
| # | 22 | internal:ab,ti  |
| # | 23 | [humans]/lim    |
| # | 24 | [embase]/lim    |
| # | 25 | OR #1 - #9      |
| # | 26 | OR #10 - #22    |
| # | 27 | AND #23 - #26   |

#### Search strategy Cochrane Library

|   |    |                         |
|---|----|-------------------------|
| # | 1  | pressure ulcer*         |
| # | 2  | pressure sore*          |
| # | 3  | pressure injur*         |
| # | 4  | pressure damage*        |
| # | 5  | deep tissue injur*      |
| # | 6  | skin ulcer*             |
| # | 7  | bed sore*               |
| # | 8  | superficial ulcer*      |
| # | 9  | decubitus               |
| # | 10 | risk                    |
| # | 11 | risk factor             |
| # | 12 | exposure                |
| # | 13 | cause                   |
| # | 14 | predict*                |
| # | 15 | prognos*                |
| # | 16 | epidemiology            |
| # | 17 | etiology                |
| # | 18 | aetiology               |
| # | 19 | extrinsic               |
| # | 20 | external                |
| # | 21 | intrinsic               |
| # | 22 | internal                |
| # | 23 | OR (#1 - #9):ti,ab,kw   |
| # | 24 | OR (#10 - #22):ti,ab,kw |
| # | 25 | AND #23 - #24           |

#### Search strategy Web of Science

|   |    |                    |
|---|----|--------------------|
| # | 1  | pressure ulcer*    |
| # | 2  | pressure sore*     |
| # | 3  | pressure injur*    |
| # | 4  | pressure damage*   |
| # | 5  | deep tissue injur* |
| # | 6  | skin ulcer*        |
| # | 7  | bed sore*          |
| # | 8  | superficial ulcer* |
| # | 9  | decubitus          |
| # | 10 | risk               |
| # | 11 | risk factor        |
| # | 12 | exposure           |

|   |    |                   |
|---|----|-------------------|
| # | 13 | cause             |
| # | 14 | predict*          |
| # | 15 | prognos*          |
| # | 16 | epidemiology      |
| # | 17 | etiology          |
| # | 18 | aetiology         |
| # | 19 | extrinsic         |
| # | 20 | external          |
| # | 21 | intrinsic         |
| # | 22 | internal          |
| # | 23 | OR TS=(#1 - #9)   |
| # | 24 | OR TS=(#10 - #22) |
| # | 25 | AND #23 - #24     |

### Search strategy CINAHL

|   |    |                       |
|---|----|-----------------------|
| # | 1  | MH "Pressure ulcer+"  |
| # | 2  | TI pressure ulcer*    |
| # | 3  | AB pressure ulcer*    |
| # | 4  | TI pressure sore*     |
| # | 5  | AB pressure sore*     |
| # | 6  | TI pressure injur*    |
| # | 7  | AB pressure injur*    |
| # | 8  | TI pressure damage*   |
| # | 9  | AB pressure damage*   |
| # | 10 | TI deep tissue injur* |
| # | 11 | AB deep tissue injur* |
| # | 12 | TI skin ulcer*        |
| # | 13 | AB skin ulcer*        |
| # | 14 | TI bed sore*          |
| # | 15 | AB bed sore*          |
| # | 16 | TI superficial ulcer* |
| # | 17 | AB superficial ulcer* |
| # | 18 | TI decubitus          |
| # | 19 | AB decubitus          |
| # | 20 | TI risk               |
| # | 21 | AB risk               |
| # | 22 | TI risk factor        |
| # | 23 | AB risk factor        |
| # | 24 | TI exposure           |
| # | 25 | AB exposure           |
| # | 26 | TI cause              |
| # | 27 | AB cause              |
| # | 28 | TI predict*           |
| # | 29 | AB predict*           |
| # | 30 | TI prognos*           |
| # | 31 | AB prognos*           |
| # | 32 | TI epidemiology       |
| # | 33 | AB epidemiology       |
| # | 34 | TI etiology           |
| # | 35 | AB etiology           |
| # | 36 | TI aetiology          |
| # | 37 | AB aetiology          |

|   |    |               |
|---|----|---------------|
| # | 38 | TI extrinsic  |
| # | 39 | AB extrinsic  |
| # | 40 | TI external   |
| # | 41 | AB external   |
| # | 42 | TI intrinsic  |
| # | 43 | AB intrinsic  |
| # | 44 | TI internal   |
| # | 45 | AB internal   |
| # | 46 | OR #1 - 19    |
| # | 47 | OR #20 - #45  |
| # | 25 | AND #46 - #47 |
