# Supplementary material for: Risk Factors for Pressure Injuries in Adult Patients: A Narrative Synthesis
Source: Int J Environ Res Public Health. 2022 Jan 11;19(2):761. doi: 10.3390/ijerph19020761 (PMC8776011; doi:10.3390/ijerph19020761)
Supplement: Supplementary file 1 [file ijerph-19-00761-s001.zip]

Archive with 6 entries (6 files):
- S1 PRISMA 2020 checklist.pdf
- S2 Search Strategies.pdf
- S3 Summary Table.pdf
- S4 Risk factor domain _mechanical boundary condition_.pdf
- S5 Risk factor domains _susceptibility and tolerance of the individual_.pdf
- S6 Additional domain _Diagnosis and Treatment_.pdf
